## EDUCATION

# Ten simple rules for empowering women in STEM

Patricia Guevara-Ramírez<sup>1</sup>, Viviana A. Ruiz-Pozo<sup>1</sup>, Santiago Cadena-Ullauri<sup>1</sup>, Gabriela Salazar-Navas<sup>1</sup>, Ana Acosta Bedón<sup>2</sup>, J. Faustino V-Vázquez<sup>3</sup>, Ana Karina Zambrano<sup>1</sup>\*

**1** Centro de Investigación Genética y Genómica. Facultad de Ciencias de la Salud Eugenio Espejo, Universidad UTE, Quito, Ecuador, **2** Department of Cell and System Biology, University of Toronto, Canada, **3** Escuela Nacional de Ciencias Biológicas, Instituto Politécnico Nacional, Ciudad de México, México

✉ These authors contributed equally to this work.

\* [anazambrano17@hotmail.com](mailto:anazambrano17@hotmail.com)

## Introduction

Gender differences have been around for many decades. In consequence, women demanded equal rights, achieving changes in education and publications of their works through revolutionary and social movements [1]. However, there is still evidence of gaps, reflected in women's underrepresentation in jobs, institutions, and education, so that gender inequality persists [2].

For example, according to the progress on the sustainable development goals (SDGs), with a gender snapshot worldwide for 2021, women hold just 28% of jobs in science, technology, engineering, and mathematics (STEM) [3].

Despite these obstacles, the research work from women in STEM has shaped the scientific understanding in many fields and continues to do so with present-day contributions such as the Coronavirus Disease 2019 (COVID-19) vaccine designed by Sarah Gilbert [4] or the genome editing technique by Jennifer Doudna and Emmanuelle Charpentier [5]. Likewise, achievements in geometric partial differential equations by Karen Keskulla Uhlenbeck, who was the first woman to win the Abel Prize for Mathematics in 2019 [6], or the discovery of a supermassive compact object at the galactic center by Andrea Chee can be mentioned [7]. In addition to these recognized women, many more continue to work for the benefit of science, inspiring girls worldwide. For example, Ecuadorian girls have sent letters to scientific women expressing their love for science (Figs 1 and 2).

Despite these significant contributions, women still receive less recognition and awards. A total of 616 Nobel Prizes were awarded between 1901 and 2019 in Physics, Science, Medicine, and Physiology; however, only 19 were awarded to women.

While some changes have been accomplished to reduce women's underrepresentation in STEM, gender bias still exists nowadays. Consequently, this article poses ten simple rules on how society could change and prevent gender differences to empower women in STEM.

## Rule 1: Avoid the “Matilda Effect”

In 1993, the science historian Margaret Rossiter coined her most famous expression, the “Matilda Effect,” to describe the bias that denies recognition to women's work. This term is in honor of Matilda Joselyn Gage, the first activist who fought for women's rights and published a landmark article titled “The Matthew Matilda Effect on Science” [8].

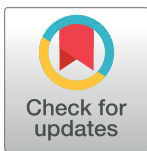

## OPEN ACCESS

**Citation:** Guevara-Ramírez P, Ruiz-Pozo VA, Cadena-Ullauri S, Salazar-Navas G, Bedón AA, V-Vázquez JF, et al. (2022) Ten simple rules for empowering women in STEM. *PLoS Comput Biol* 18(12): e1010731. <https://doi.org/10.1371/journal.pcbi.1010731>

**Editor:** Scott Markel, Dassault Systemes BIOVIA, UNITED STATES

**Published:** December 22, 2022

**Copyright:** © 2022 Guevara-Ramírez et al. This is an open access article distributed under the terms of the [Creative Commons Attribution License](https://creativecommons.org/licenses/by/4.0/), which permits unrestricted use, distribution, and reproduction in any medium, provided the original author and source are credited.

**Funding:** The publication of this article will be funded by Universidad UTE-Ecuador. The funder had no role in the study design, bibliographic analysis, decision to publish, or preparation of the manuscript.

**Competing interests:** The authors have declared that no competing interests exist.

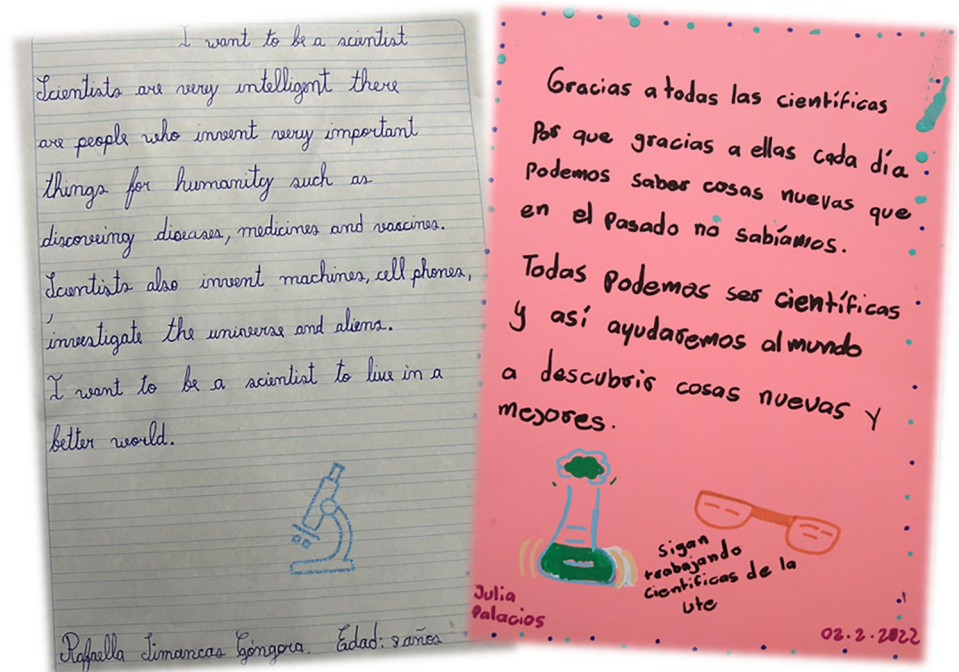

**Fig 1. Letters of girls interested in science (English and Spanish) (Written by Rafaela Simancas and Julia Palacios).**

<https://doi.org/10.1371/journal.pcbi.1010731.g001>

While women have gained significant ground in the scientific world, there is still a lack of recognition. For example, enterprises tend to hire men, rate them better in their applications, and pay them higher salaries [9]. Furthermore, reviewers tend to give positive comments on scientific papers in which men are the first author [10]. There is also a disproportionate number of citations to studies written by female scientists and fewer award nominations and collaboration opportunities for women [11]. Thus, it is important to eliminate the “Matilda Effect” to ensure the recognition of women’s work and scientific achievements.

One simple initiative could target mentors to encourage female researchers to seek awards and come up with candidates for recognition or leadership positions. Similarly, before selecting the candidates, the selection criteria should be gender-blind. Anonymizing applications could ensure that the ratings reflect the merits of the postulants and mitigate gender bias in the review [12–15].

Moreover, for scientific publications, the academic leaders could determine authorship based on the contributions, and editors of scientific journals should analyze data regarding the gender breakdown of papers and promote the awareness of the editorial staff to work on initiatives to overcome gender bias.

Finally, other solutions to mitigate this effect include: providing gender inclusion workshops in organizations to help build an inclusive workplace, lead to more gender-neutral hiring, and actively share their scientific work in different media such as social networks, blogs, conferences, and others to let society know what they are doing for science worldwide. To sum up, to abolish the “Matilda Effect,” governments and institutions should work on an inclusive society with initiatives to ensure the acknowledgment of women’s contribution (Fig 3).

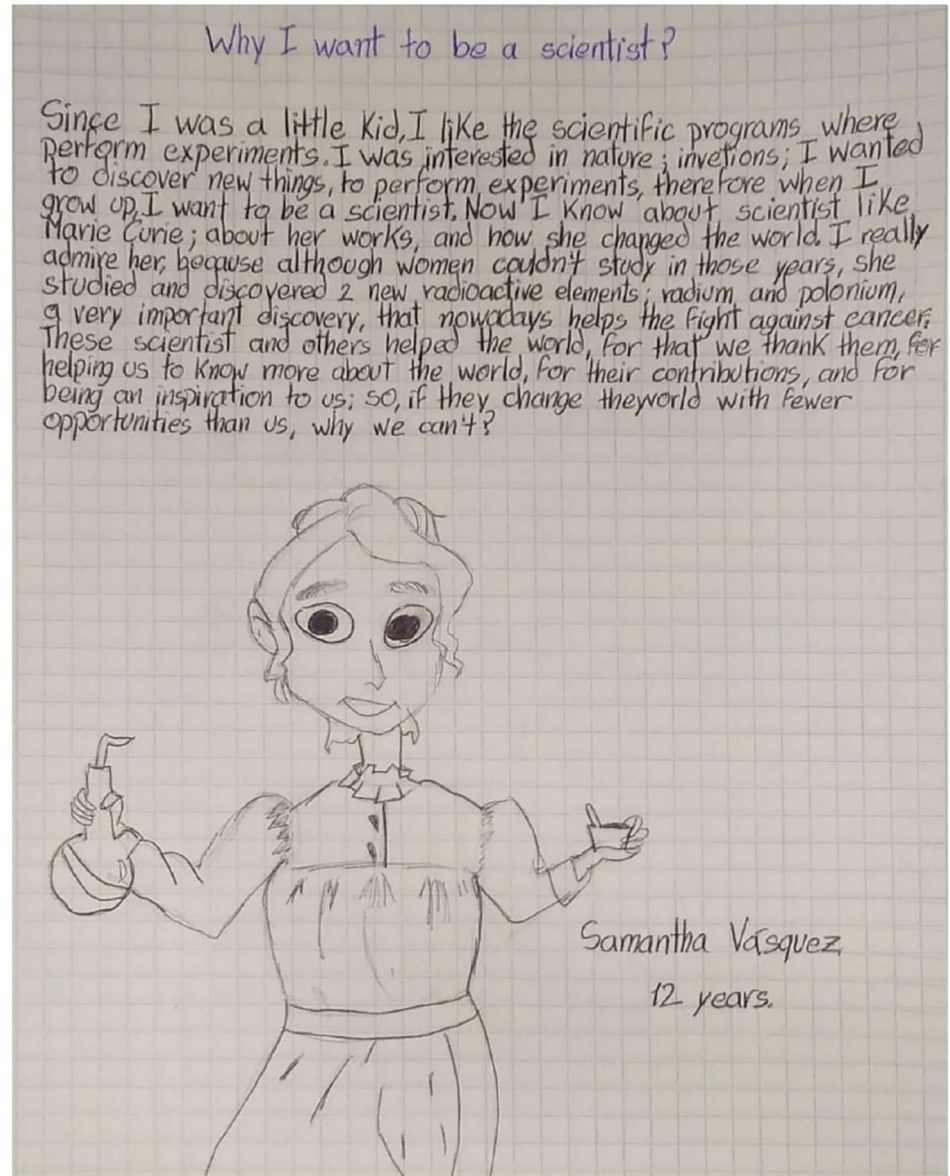

**Fig 2. Letters of girls interested in science (Written by Samantha Vásquez).**

<https://doi.org/10.1371/journal.pcbi.1010731.g002>

## Rule 2: Empower other women through solidarity between them

On several occasions, women have faced discrimination, racism, inferiority, and even competition or exclusion among women themselves [16,17]. Throughout history, according to Amelia Valcárcel, some relationships between women have been quite complex, creating difficulties such as power differentials, hierarchies, supremacism, sabotage, competition, and rivalry [18].

Solidarity between women is bound by shared ideals to build trust, reciprocal recognition, and support for one another, enhanced by women's teams cooperating throughout the various stages of the research career (Fig 4). These groups of women allow sharing of professional knowledge and experiences to develop skills effectively [19]. For example, in January 2018, the platform Request a Woman in STEMM (science, technology, engineering, mathematics, and

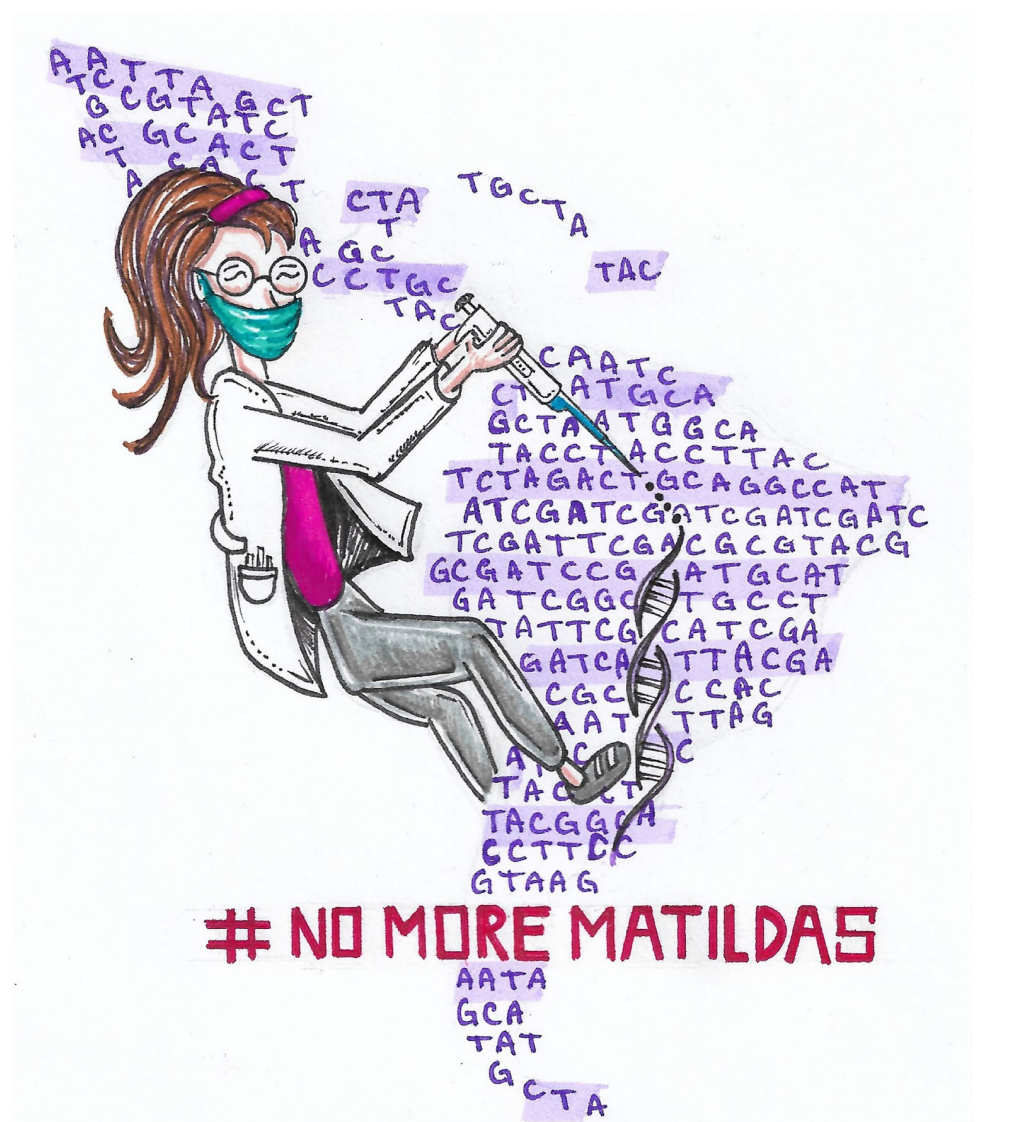

**Fig 3. Avoid the “Matilda Effect”.** To increase the recognition of women researchers, the “Matilda Effect” must be avoided (Illustrated by Jose Faustino Villa).

<https://doi.org/10.1371/journal.pcbi.1010731.g003>

medicine) was created by a cohort of 500 women scientists. This platform connects a broad multidisciplinary group of women in science, allowing the community to contact them [20].

Other initiatives are the program “Women and Engineering” of the Royal Academy of Engineering, which promotes STEM vocations based on the experience of women working in these areas [21], and the “Girls in Tech” organization helps to connect and learn from other women in technology via mentorship programs, community events, and online discussions. Likewise, “CODE2040” creates opportunities for underrepresented women minorities in technology [22].

By establishing solidarity between women as an empowerment strategy, great motivation can be obtained. It is essential to work as a team and share knowledge to grow together, instead of disregarding each other and considering each other as rivals [19,23,24]. Thus, to empower women through solidarity, bridges of dialogue must be built, creating interpersonal relationships with other experienced women who can give guidance and advice.

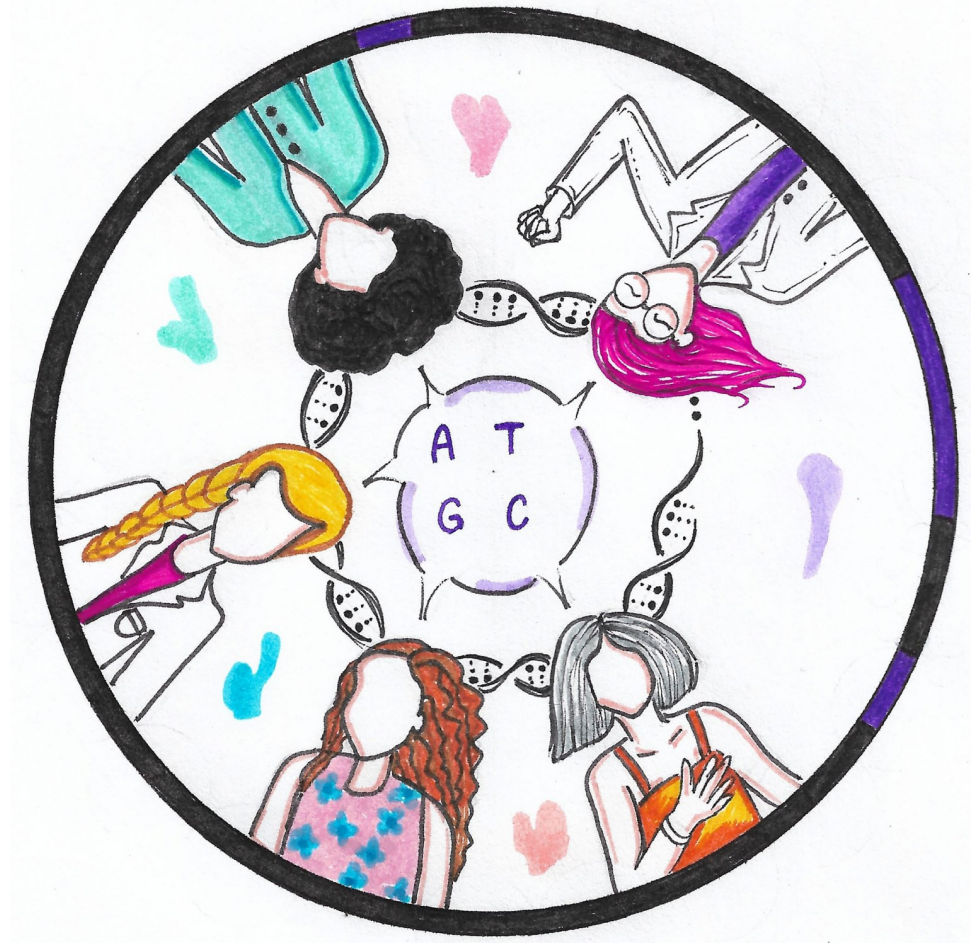

**Fig 4. Empower other women through solidarity between them.** A group of women joined together by common interests (Illustrated by Jose Faustino Villa).

<https://doi.org/10.1371/journal.pcbi.1010731.g004>

### Rule 3: Collaborate with other research groups, organizations, and institutions

In STEM careers, collaboration between researchers is essential to address perplexing questions and solve complex problems that arise in research. Cooperation within the work team and with other groups is indispensable to developing research with an interdisciplinary and multidisciplinary approach [25]. Research must be open to interacting with different sciences and carrying out studies at an international level for the mutual development of underrepresented regions like Latin America.

However, studies mention that differences in collaboration based on gender bias can affect the effectiveness of team building, recruitment, and retention of researchers [26,27].

Helicopter research is another problem. This is a practice in which scientists from wealthy countries take samples, and materials from lower-income countries, publishing the results with little involvement from the local (women) scientists. Women may be more vulnerable to these types of science because of their desire for collaboration [28]. Consequently, unequal collaborative research practices are based on gender or resource appropriation.

Solutions to abolish these problems are: (a) promote collaborative research practices from the beginning and not perpetuate colonization practices [29]; (b) establish an agreement that outlines equal scientific partnership [30]; and (c) consider the women who have been part of the research when establishing the collaboration.

Finally, recent studies suggest that collaboration could be improved by the presence of women in the research team. Hence, promoting women's participation in STEM staff could increase scientific productivity and the quality of the collaborations (Fig 5).

#### Rule 4: Research and publish

Scientific publications are essential to demonstrate professional growth in the field (Fig 6). Since 1994, there has been an increase in women as the first authors of publications. However, the COVID-19 pandemic showed a decrease in women's scientific contributions [31].

In the STEM profession, publications and grants are the most crucial metrics for recognizing the impact of science [32]. There are studies on gender bias in research and publication, which describe: (a) men are invited for paper submissions at double the rate of women [33]; (b) male scientists have an average of 3.6 more papers than female authors, consisting of a 27% gap in productivity [34]; (c) articles published by male scientists receive 30% more citations than female scientists [34,35]; (d) a negative correlation between journal impact factor and women representation [36,37]; and (e) a fewer percentage of females than males in journal editorial boards [38]. Thus, women in STEM need to be encouraged and supported throughout the publication system.

Actions like increasing the funding for grants and publications for women and double-blind reviews can be strategies to increase women's authorship representation. Another way to promote women's publications is by organizing workshops and congresses for female-led research [39,40].

Similarly, the Declaration on Research Assessment (DORA) aims to raise awareness in the use of metrics that align with core academic values, develop new policies for decision-making, and spread research [41–43]. Adopting DORA promotes the reduction of the existing gender gap and equity. DORA should be implemented in institutions to empower better career metrics for women researchers.

#### Rule 5: Ask for help

Starting a new job or developing a new project with a close deadline could make women feel anxious, but there is one clear solution: ASK FOR HELP (Fig 7).

Being an independent women scientist does not mean doing everything on your own; there could be stages of a process that a scientist does not fully dominate. When there are doubts, it is important to work together and ask for help from people who have more expertise in the area [44].

A research group may be a particularly uncomfortable space, where asking for help is challenging, since it is a place where the researchers are trying to demonstrate as much experience, competence, and confidence as possible. However, asking for support could mean improved performance and continued professional development gained from advice, referrals, and resources [44,45].

Some estimates suggest that up to 90% of the help received from colleagues is by direct request. Therefore, it is necessary to formulate the request effectively, concisely, and clearly. Furthermore, it is important to use the correct language and to acknowledge the benefits that the help could have on the final product [45].

Women asking for help will become more resilient and successful researchers.

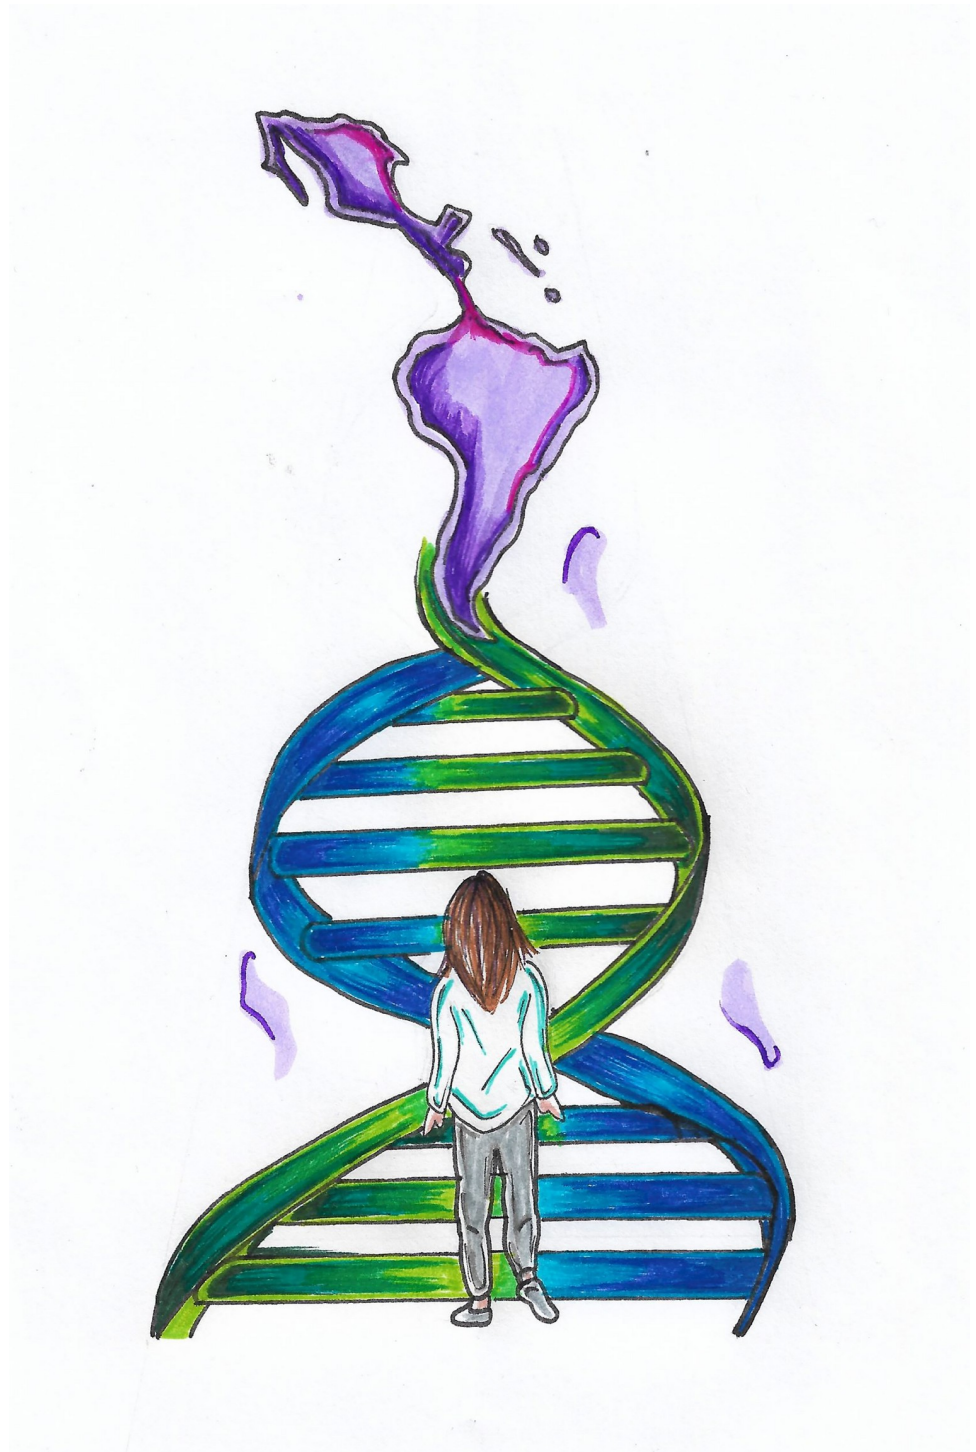

**Fig 5. Collaborate with other research groups, organizations, and institutions.** Knit educational programs, research, networks, and other international initiatives designed to promote fair and equitable collaboration (Illustrated by Jose Faustino Villa).

<https://doi.org/10.1371/journal.pcbi.1010731.g005>

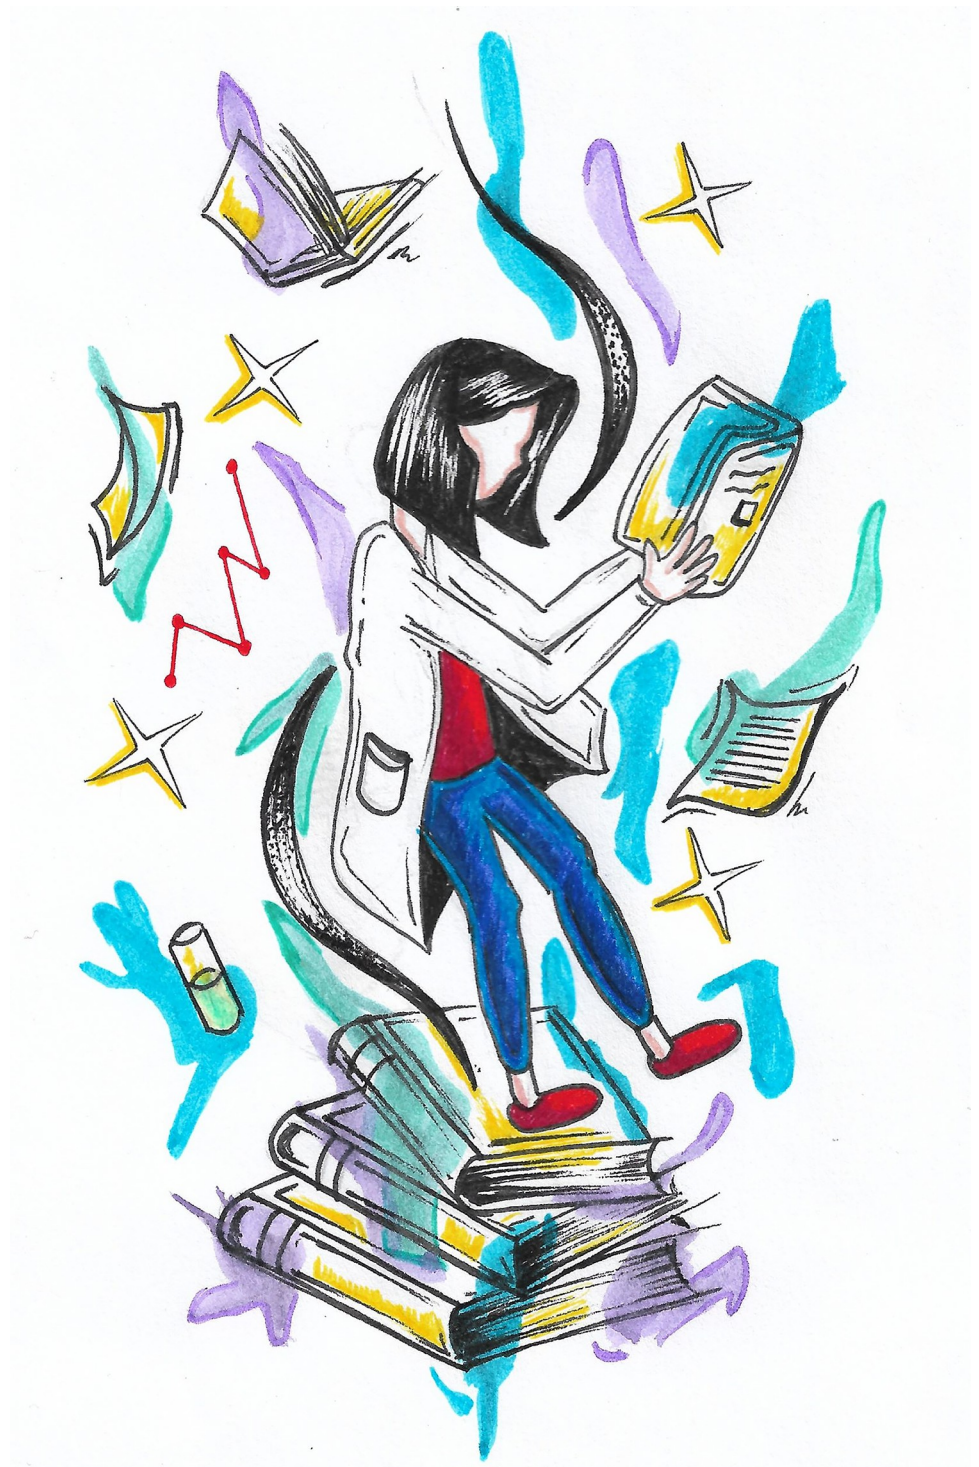

**Fig 6. Research and publish.** Women scientists require more actions that promote the publishing of their research (Illustrated by Jose Faustino Villa).

<https://doi.org/10.1371/journal.pcbi.1010731.g006>

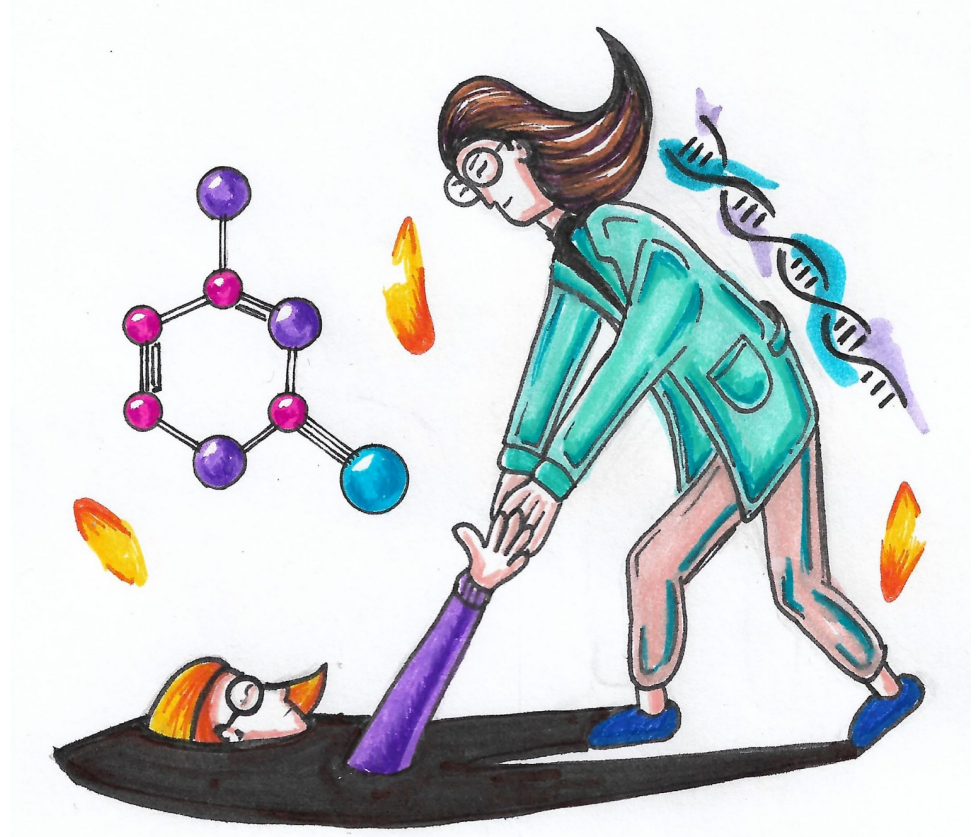

**Fig 7. Ask for help.** Researchers help researchers to develop science and be part of the scientific world (Illustrated by Jose Faustino Villa).

<https://doi.org/10.1371/journal.pcbi.1010731.g007>

### **Rule 6: Stop the prejudices—Do not feel different for being a woman**

Women may feel inferior just because of being a woman. The Women in Science and Technology Equal Opportunity Act declares that men and women have equal opportunity in education, training, and employment in scientific and technical fields [46]. However, evidence suggests that people may perceive scientists as more like men than women. In this context, more pictures of male scientists are seen in science magazines. Furthermore, in experiments using the Draw-a-Scientist test, in which children of different ages participated, they drew a higher percentage of men as scientists [47,48].

This problem is further exacerbated by some unconscious behaviors of parents and teachers who promote the thinking that certain STEM disciplines are more suitable for men. The effect of implicit stereotyping of children from a very early age can differentially influence interest, achievement, and persistence in particular sciences, such as the field of genetics, molecular biology, engineering, and other sciences involved [49].

In addition, there are negative stereotypical perceptions of women based on their appearance, clothing, how much makeup they have, and other banal aspects not related to their work in science [47].

One solution is to create support centers for women and open spaces to discuss these issues. Additionally, gender equality training should be introduced at all levels of education since it

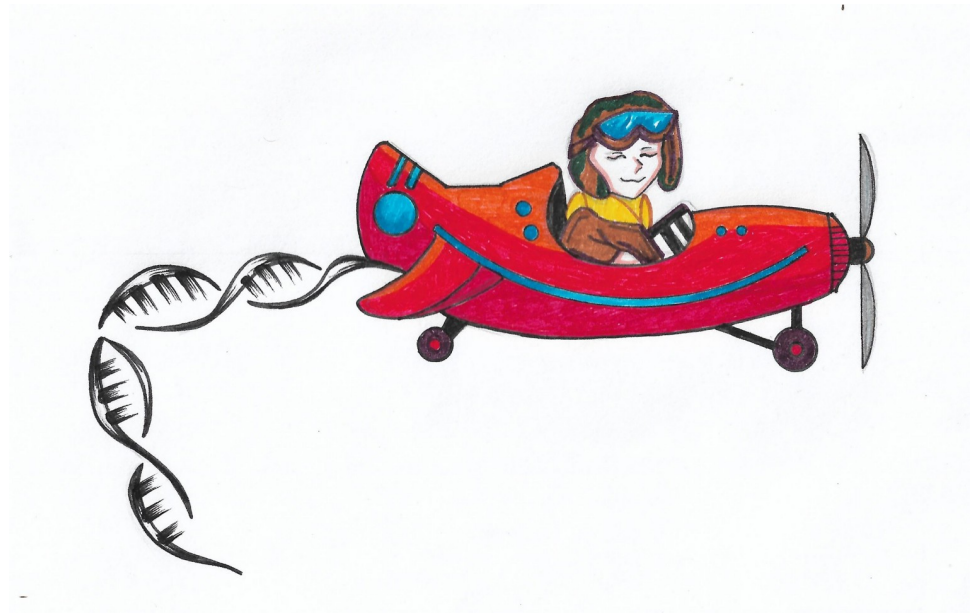

**Fig 8. Stop the prejudices.** “The most difficult thing is the decision to act. The rest is merely tenacity”—Amelia Earhart (Illustrated by Jose Faustino Villa).

<https://doi.org/10.1371/journal.pcbi.1010731.g008>

would help to reduce gender bias, harassment, and the persistence of negative stereotypes. These education programs are essential to show children that men and women can perform notably in STEM fields and do science [47]. But the most important part of the change starts with women, who should believe in themselves as one way to demonstrate that males and females are equal and stop prejudices against women (Fig 8).

### Rule 7: Encourage STEM education

One of the most challenging decisions in a person’s life is career choice. Many teenagers are often confused and tend to fall into stereotypes, believing that professions depend on gender, social identities, and self-concepts. Even though there are STEM women role models, who could impact positively on girls’ career decisions, it is crucial to start empowering them at an early age [50,51].

Gender differences in STEM participation are visible from childhood and continue throughout academic life. For example, women represented only 35% of students enrolled in STEM disciplines in higher education in 2017 [52]. Women’s underrepresentation in STEM education could result from the interaction of social, cultural, psychological, and learning process barriers [50].

Moreover, studies suggested that family and teachers tend to encourage more mathematics, science, and technology learning in boys than in girls through play opportunities, games, or toys during childhood [53]. Research in toy-buying patterns revealed that it is common to give science-related toys to a boy, a stereotype that might incline boys toward science careers [54]. Thus, the aforementioned factors could influence women’s career choices, depriving them of getting access to STEM studies.

The interventions to solve the gender education–STEM gap include building interest and motivation in girls by developing science skills in early life and expanding family understanding of STEM education opportunities connecting girls with quality education. At the school

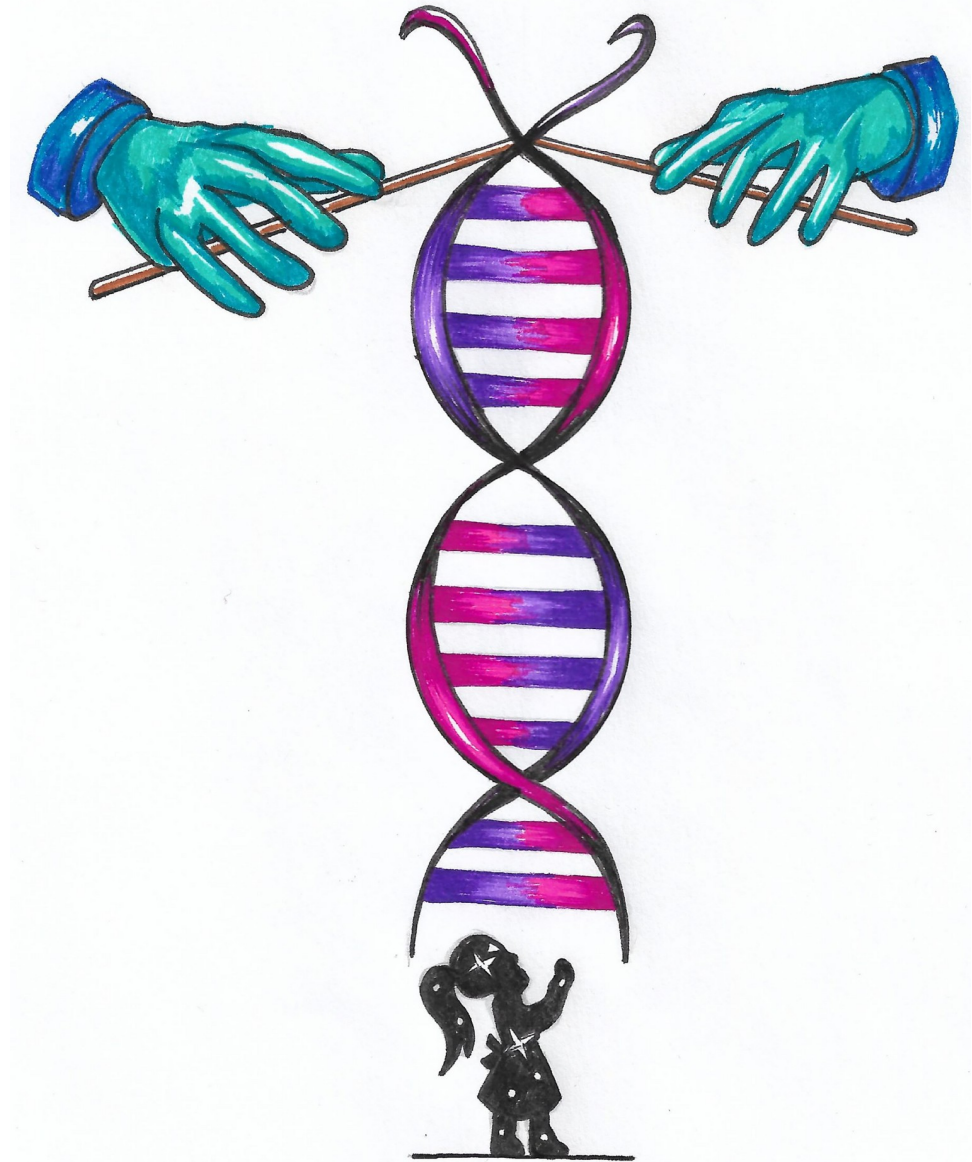

**Fig 9. Encourage STEM education.** Girl building her education in STEM (Illustrated by Jose Faustino Villa).

<https://doi.org/10.1371/journal.pcbi.1010731.g009>

level, the efforts must impact curricula to include gender gap studies in the society. Furthermore, countries should focus on making social and cultural changes in their legislation, allowing and motivating women to access STEM education [28,55].

Therefore, women must be empowered and guided from the beginning of their educational life (Fig 9). Since, studying science in any of its specialties is a life decision that requires quality education, different governments and foundations should offer scholarships for academic training.

### **Rule 8: Balance time to perform roles in society and family**

Modern women have several roles in society and family, and combining them with professional STEM careers can be challenging [56].

There are gender biases that impact women's careers in the balance of work and family. Parenting kids directly affects women in science; not even the resourceful countries offer the most basic support for women with children. Consequently, caregiving typically becomes the mother's responsibility, limiting the research and study time [57,58]. Every role is important for society, so the government and academia should implement effective policies that allow progress in the SDGs with the gender snapshot [58].

Studies have reported recommendations to achieve a better work–life synergy. Some examples are: (a) introducing child and elder care facilities; (b) work time analysis to reduce the overload with the possibility of hiring additional personnel; (c) strong colleague relationships in the company for effective teamwork; and (d) planning training on time management in the annual capacitation plan; among others [58].

In addition, personal endeavors to balance time are: (a) establishing priorities among tasks and roles; (b) planning and scheduling work, personal, social, and familial activities; (c) building boundaries between work and social activities; and (d) organizing vacations; among others [59–63].

The work–life balance constitutes an indicator of life satisfaction. The key is to learn how to manage time-limiting job activities and leave enough time for themselves and their social and family lives (Fig 10).

### **Rule 9: Remember that it is never too late**

Internal or external factors might lead our career pathways to unexpected places we did not plan. The rule “it is never too late” highlights the diversity and limitations that have led women to start their careers and motivates them to request initiatives that focus on their professional growth.

Life experiences could persuade women to stop following their dreams in STEM, like (a) early marriage or motherhood, where money prioritization does not allow them to study [64]; (b) some religions' cultural norms and doctrines affect a woman's educational career choices [65]; (c) unpleasant experiences with teachers of science-related subjects could demotivate them [66]; (d) choose a career other than one in STEM thinking that is more suitable to their interests [67]; and (e) scholarship and study positions limited by age. These reasons are why some women and young girls might not apply for a STEM program, even if they are attracted to it.

To solve these issues, provide information on STEM careers, aptitude tests, and psychological counseling to women to analyze their career goals.

Moreover, it is important to reconsider the academia application requirements without limiting scholarships or positions to certain ages. It is never too late to change or create pathways for a fulfilled professional life (Fig 11). Hence, it is crucial to take some time to recapitulate and decide if you are in the place you want or at least if your decisions are leading you there.

### **Rule 10: Remember our capacities and strength**

STEM professionals who believe brilliance is required for success are more likely to doubt their capacities. Doubting one's abilities and constant fear of being exposed as a fraud is a pattern of thinking known in psychology as the Impostor Syndrome. This psychological phenomenon does not depend on external evidence of success but rather on a state of mind in which a person believes it is not enough [68] (Fig 12). The characteristic effects of this syndrome are: attributing the success to external factors; fear and guilt about success or not living up to expectations; self-doubt or denial of your competence and skills; refusing praise, and sabotaging your success [69].

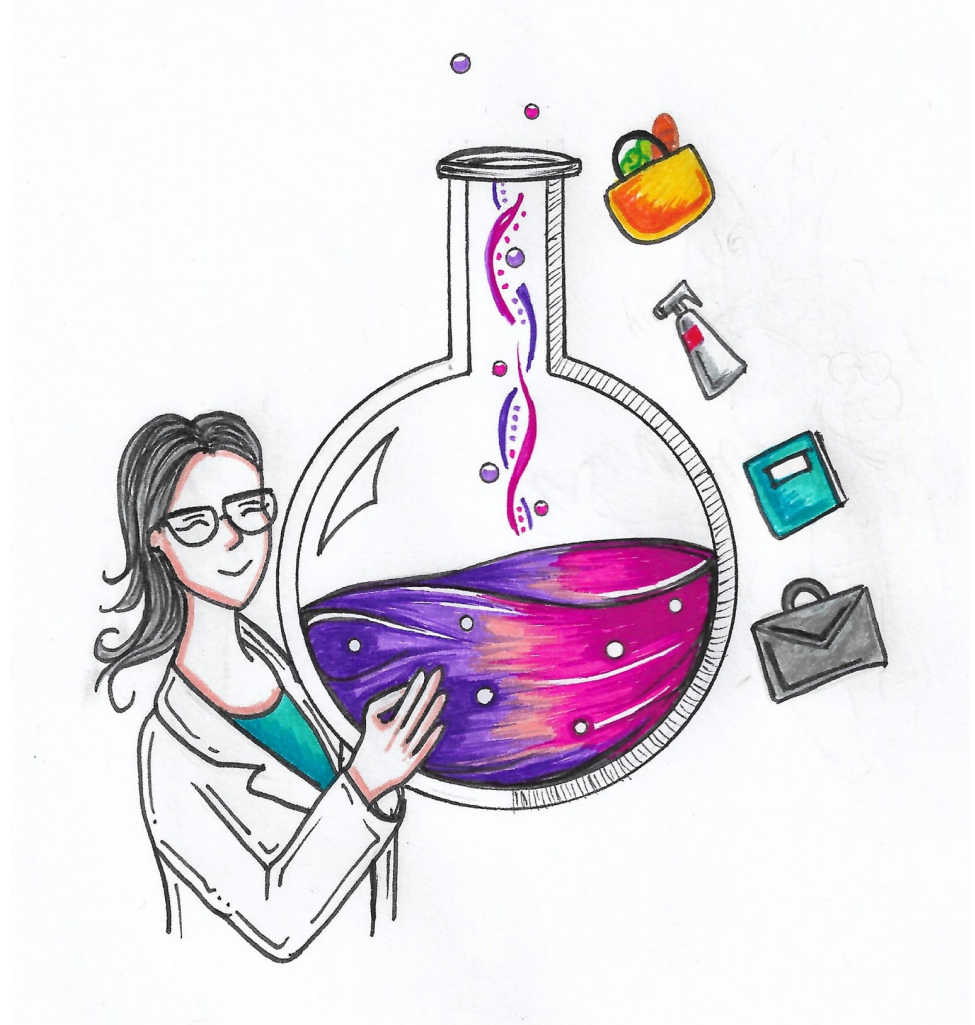

**Fig 10. Balance time to perform roles in society and family.** Women scientists balance their time to perform the different roles in society and family (Illustrated by Jose Faustino Villa).

<https://doi.org/10.1371/journal.pcbi.1010731.g010>

In STEM, imposter syndrome is common because of the rapid technological advancement and change, which no one could ever keep up with, but sometimes researchers feel they should [70]. Studies estimated that 70% of people have suffered at least one experience of the imposter phenomenon affecting both men and women [71,72]. Nevertheless, a study on 5,000 STEM students and graduates found that women are more likely to feel they do not deserve recognition for their achievements [73].

Methods to overcome the imposter syndrome are focused mainly on recognizing your potential since women have always been resilient and capable of doing their job [74]. Some suggestions are: celebrate your achievements; utilize additional support (friends, therapist); remember that perfectionism is subjective [75]; stop comparing with others; identify when it occurs; set measurable goals; and, lastly, positive thinking.

Mental and physical health are necessary to develop capacities and strength; therefore, women must change their internal talk and external influences to motivate and remind themselves about what they can achieve.

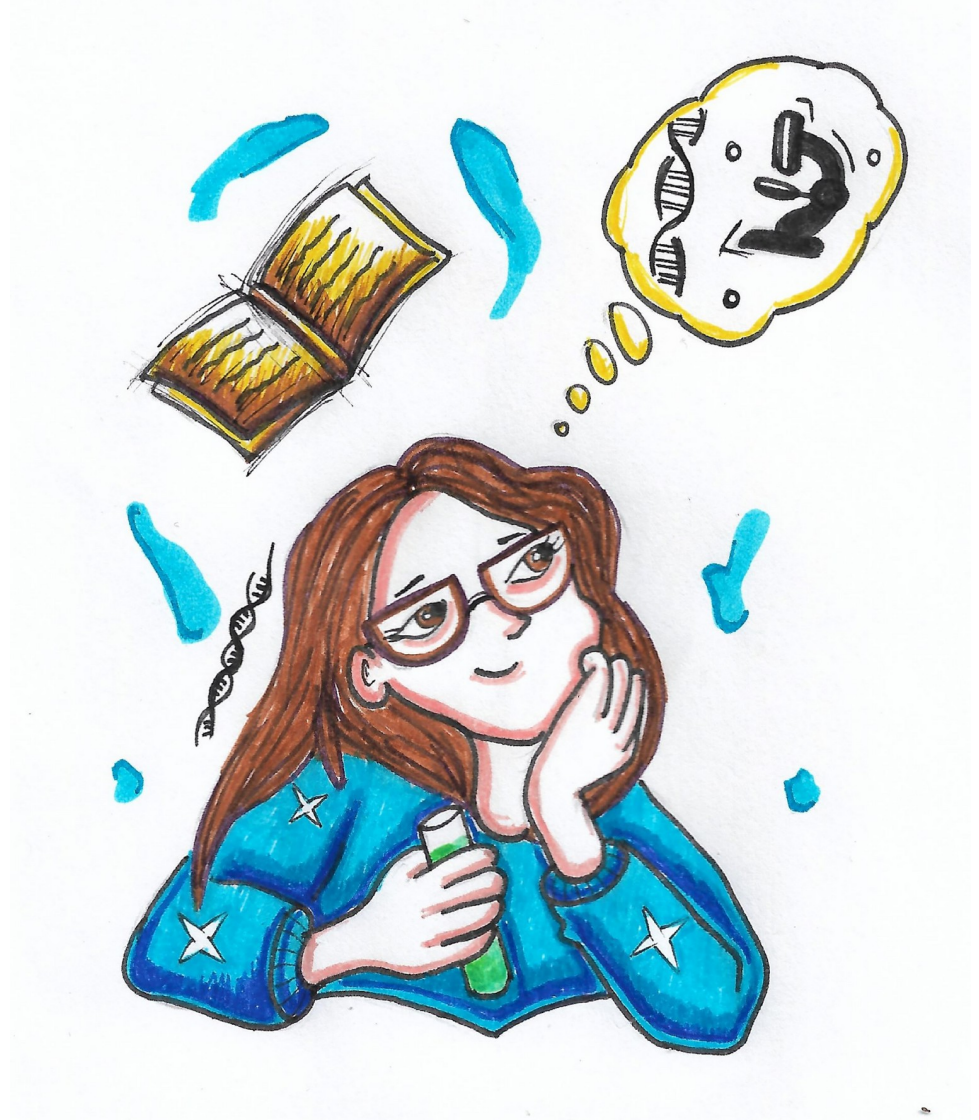

**Fig 11. Remember that it is never too late.** Every step counts while we are building a way to reach our purposes (Illustrated by Jose Faustino Villa).

<https://doi.org/10.1371/journal.pcbi.1010731.g011>

## Conclusions

These rules may not be the only ones for being an empowered STEM women researcher. However, we hope our ideas and experiences will help readers to realize the need to build an equitable STEM community.

Our expectation with this article is that it will serve as a basis for governments, institutions, and academia to generate policies that contribute to the participation of women in science. Such policies could open the range of possibilities for women from an early age to decide their professional future with freedom, without fear of failure, and without considering unconscious bias.

Science and technology should no longer be deprived of the potential that women have.

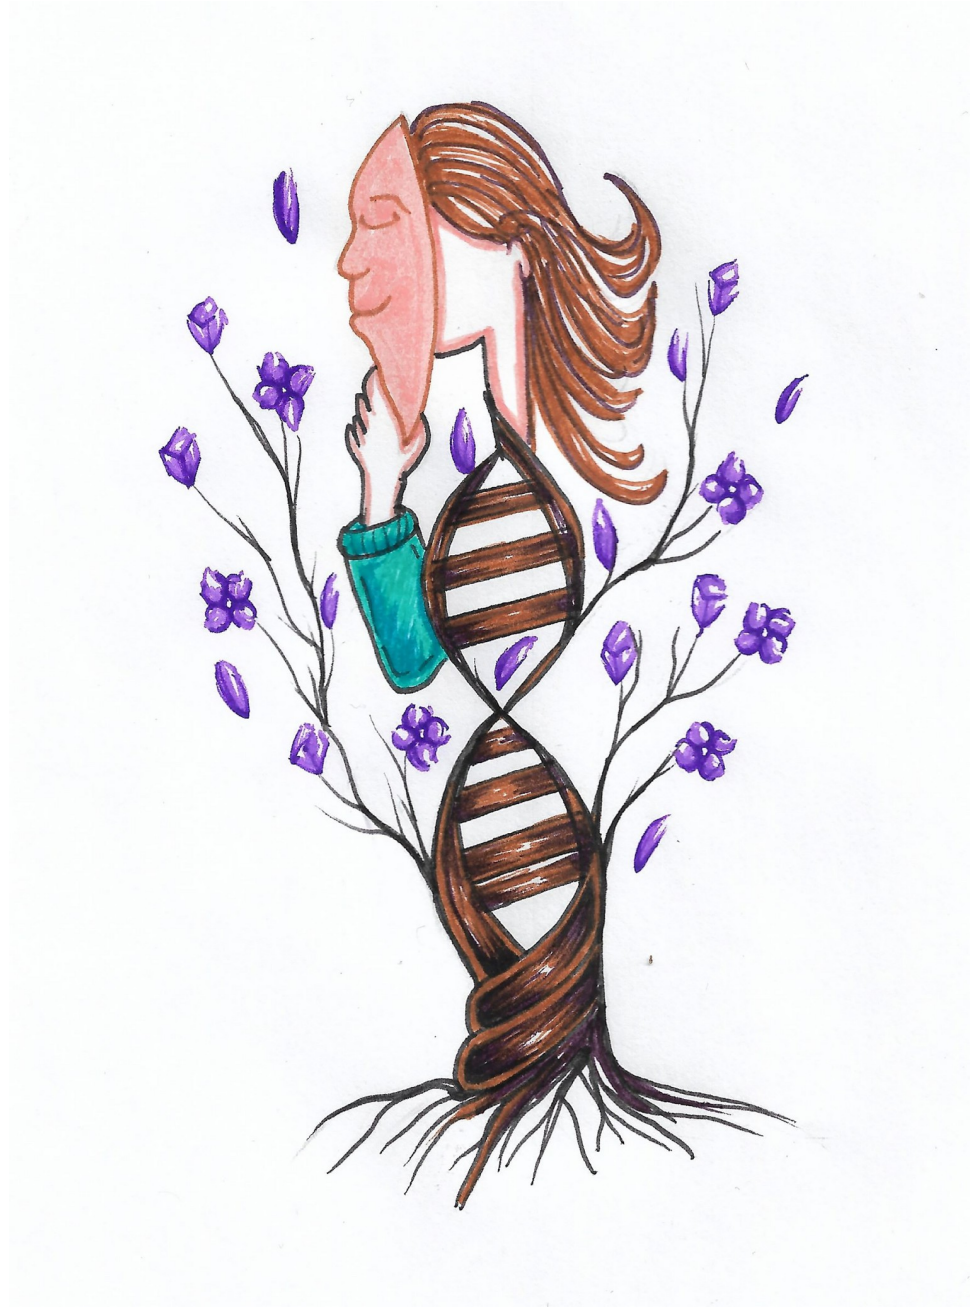

**Fig 12. Remember our capacities and strength.** Do not mask your capacities; remember that all your success is because of them (Illustrated by Jose Faustino Villa).

<https://doi.org/10.1371/journal.pcbi.1010731.g012>

## Acknowledgments

We are grateful to the Universidad UTE for supporting the researchers, promoting campaigns, and opening spaces to raise awareness in the community about gender equality. This article was written to all the women scientists that at some point in their careers were silenced. It was also to inspire all the girls who dream of becoming scientists, especially Samantha Vasquez, Rafaella Simancas, and Julia Palacios who wrote letters talking about their love for science, as well as their wish to be a scientist. Also, to their parents who allowed them to participate in this

article. Finally, a special thanks to Jose Faustino Villa who supported us with the amazing illustrations (Figs 3 to 12).

## References

1. Council of Europe. Feminism and Women's Rights Movements [Internet]. 2022 [cited 2022 Jul 19]. Available from: <https://www.coe.int/en/web/gender-matters/feminism-and-women-s-rights-movements>
2. UNESCO. Women in Science The gender gap in science, Fact Sheet No. 55 [Internet]. 2019 [cited 2021 Oct 18]. Available from: <http://uis.unesco.org>
3. Women UN. Snapshot of gender equality across the Sustainable Development Goals. UN Women Publ. 2021:1–33.
4. Lane R. Sarah Gilbert: carving a path towards a COVID-19 vaccine. *Lancet* [Internet]. 2020 Apr 18 [cited 2022 Feb 2];395(10232):1247. Available from: <http://www.thelancet.com/article/S0140673620307960/fulltext>
5. Doudna JA, Charpentier E. The new frontier of genome engineering with CRISPR-Cas9. *Science* (80-). 2014; 346(6213).
6. Cook AJ. Karen Keskulla Uhlenbeck. The Privileged Playgoers of Shakespeare's London, 1576–1642 [Internet]. 2015 [cited 2022 Jul 20]. p. 44–5. Available from: <https://abelprize.no/abel-prize-laureates/2019>
7. The Nobel Prize. Nobel Prize awarded women [Internet]. [cited 2022 Jul 19]. Available from: <https://www.nobelprize.org/prizes/lists/nobel-prize-awarded-women/>
8. Gage MJ. Woman as an Inventor Author. *North Am Rev.* 1883; 136(318):478–489.
9. Knobloch-Westerwick S, Glynn CJ, Hugué M. The Matilda Effect in Science Communication: An Experiment on Gender Bias in Publication Quality Perceptions and Collaboration Interest. *Sci Commun.* 2013; 35(5):603–625.
10. Haynes C. What is the “Matilda Effect,” and How Can We Improve Recognition of Women Scientists? *Sustainable Nano.* 2017. Available from: <https://sustainable-nano.com/2017/03/08/what-is-the-matilda-effect-and-how-can-we-improve-recognition-of-women-scientists/>
11. Lincoln AE, Pincus S, Koster JB, Leboy PS. The Matilda Effect in science: Awards and prizes in the US, 1990s and 2000s. *Soc Stud Sci.* 2012; 42(2):307–320. <https://doi.org/10.1177/0306312711435830> PMID: 22849001
12. Segado-Boj F, Prieto-Gutiérrez JJ, Quevedo-Redondo R. El Efecto Matilda en la red de coautorías Hispanoamericana en Comunicación. *Rev Mediterránea Comun.* 2021; 12(2):77.
13. Sequeiros J, Gibbon S, Clarke A. Genetics and ethics in Latin America. *J Community Genet.* 2015; 6(3):185–187. <https://doi.org/10.1007/s12687-015-0241-5> PMID: 26054699
14. Sarna D. The Matilda Effect in Academia and STEM [Internet]. 2021. Available from: <https://www.safecity.in/the-matilda-effect-in-academia-and-stem/>
15. Foley M, Williamson S. Does anonymising job applications reduce gender bias?: Understanding managers' perspectives. *Gend Manag.* 2018; 33(8):623–635.
16. Pérez Sánchez L, Rábago De Ávila M, Guzmán Ortiz M, de Jesús Zamora Pérez R. Sororidad en los procesos de envejecimiento femenino. *Diversitas.* 2018; 14(1):13–26.
17. Martínez CS. Procesos de empoderamiento y liderazgo de las mujeres a través de la sororidad y la creatividad. *Dossiers Fem.* 2017; 22:49–72.
18. Valcárcel A. The collective memory and challenges of feminism. Eighth Regional Conference on Women in Latin America and the Caribbean. 2002:1–34.
19. García N. La sororidad como vía para la formación docente en mujeres. *Rev Dilemas Contemp Educ Política y Valores* [Internet]. 2021; 3(1):1–11. Available from: <http://www.dilemascontemporaneoseduccionpoliticaayvalores.com/>
20. McCullagh EA, Nowak K, Pogoriler A, Metcalf JL, Zaringhalam M, Zelikova TJ. Request a woman scientist: A database for diversifying the public face of science. *PLoS Biol.* 2019; 17(4):1–11. <https://doi.org/10.1371/journal.pbio.3000212> PMID: 31013291
21. Joyce T, Hopkins C. Minority report: Female first year students' experience of Engineering Teams. *Engl Educ.* 2012; 7(1):20–29.
22. Macho M. Veinte mujeres inspiradoras en carreras STEM [Internet]. 2017. Available from: <https://mujeresconciencia.com/2017/06/28/veinte-mujeres-inspiradoras-en-carreras-stem/>
23. Rodríguez LJ. Sororidad. Aliada para la participación política de las mujeres. [Internet]. 2019. Available from: [https://www.academia.edu/39342509/Sororidad\\_Aliada\\_para\\_la\\_participación\\_política\\_de\\_las\\_mujeres\\_La\\_Sororidad\\_como\\_aliada\\_para\\_la\\_participación\\_política\\_de\\_las\\_mujeres\\_Contentido](https://www.academia.edu/39342509/Sororidad_Aliada_para_la_participación_política_de_las_mujeres_La_Sororidad_como_aliada_para_la_participación_política_de_las_mujeres_Contentido)

24. Bernal XE, Rojas B, Pinto MA, Mendoza-Henao ÁM, Herrera-Montes A, Herrera-Montes MI, et al. Empowering Latina scientists. *Science*. 2019; 363:825–6. <https://doi.org/10.1126/science.aaw6004> PMID: 30792295
25. Bennett LM, Gadlin H. Collaboration and team science: From theory to practice. *J Investig Med*. 2012; 60(5):768–775. <https://doi.org/10.2310/JIM.0b013e318250871d> PMID: 22525233
26. Bozeman B, Gaughan M. How do men and women differ in research collaborations? An analysis of the collaborative motives and strategies of academic researchers. *Res Policy* [Internet]. 2011; 40(10):1393–1402. <https://doi.org/10.1016/j.respol.2011.07.002>
27. Bear JB, Woolley AW. The role of gender in team collaboration and performance. *Interdiscip Sci Rev*. 2011; 36(2):146–153.
28. Araújo EB, Araújo NAM, Moreira AA, Herrmann HJ, Andrade JS. Gender differences in scientific collaborations: Women are more egalitarian than men. *PLoS ONE*. 2017; 12(5):1–10. <https://doi.org/10.1371/journal.pone.0176791> PMID: 28489872
29. Haelewaters D, Hofmann TA, Romero-Olivares AL. Ten simple rules for Global North researchers to stop perpetuating helicopter research in the Global South. *PLoS Comput Biol* [Internet]. 2021; 17(8):1–8. <https://doi.org/10.1371/journal.pcbi.1009277> PMID: 34411090
30. Jordanovsky A, Nedlin S. The Formula for Gender Equality: More Women in STEM-fields [Internet]. 2022. Available from: <https://impakter.com/formula-for-gender-equality-more-women-in-stem-fields/>
31. Staniscuaski F, Kmetzsch L, Soletti RC, Reichert F, Zandonà E, Ludwig ZMC, et al. Gender, Race and Parenthood Impact Academic Productivity During the COVID-19 Pandemic: From Survey to Action. *Front Psychol*. 2021; 12(May):1–14. <https://doi.org/10.3389/fpsyg.2021.663252> PMID: 34054667
32. Davies SW, Putnam HM, Ainsworth T, Baum JK, Bove CB, Crosby SC, et al. Promoting inclusive metrics of success and impact to dismantle a discriminatory reward system in science. *PLoS Biol*. 2021; 19(6):1–15.
33. Holman L, Stuart-Fox D, Hauser CE. The gender gap in science: How long until women are equally represented? *PLoS Biol*. 2018; 16(4):1–20. <https://doi.org/10.1371/journal.pbio.2004956> PMID: 29672508
34. Huang J, Gates AJ, Sinatra R, Barabási AL. Historical comparison of gender inequality in scientific careers across countries and disciplines. *Proc Natl Acad Sci U S A* [Internet]. 2020 Mar 3 [cited 2022 Jul 20]; 117(9):4609–16. Available from: <https://www.pnas.org/doi/abs/> <https://doi.org/10.1073/pnas.1914221117> PMID: 32071248
35. Ross MB, Glennon BM, Murciano-Goroff R, Berkes EG, Weinberg BA, Lane JI. Women are Credited Less in Science than are Men. *Nature*. 2022;(June).
36. Bendels MHK, Müller R, Brueggmann D, Groneberg DA. Gender disparities in high-quality research revealed by nature index journals. *PLoS ONE*. 2018; 13(1):1–21. <https://doi.org/10.1371/journal.pone.0189136> PMID: 29293499
37. Ghiasi G, Larivière V, Sugimoto CR. On the compliance of women engineers with a gendered scientific system. *PLoS ONE*. 2015; 10(12):1–19. <https://doi.org/10.1371/journal.pone.0145931> PMID: 26716831
38. Helmer M, Schottdorf M, Neef A, Battaglia D. Gender bias in scholarly peer review. *elife*. 2017; 6:1–18. <https://doi.org/10.7554/eLife.21718> PMID: 28322725
39. Bhagat V. Women Authorship of Scholarly Publications in STEM: Authorship Puzzle. *Fem Res*. 2019; 2(2):66–76.
40. Shah A, Lopez I, Surnar B, Sarkar S, Duthely LM, Pillai A, et al. Turning the Tide for Academic Women in STEM: A Postpandemic Vision for Supporting Female Scientists. *ACS Nano*. 2021; 15(12):18647–18652. <https://doi.org/10.1021/acsnano.1c09686> PMID: 34850631
41. Gagliardi AR, Boury H, Albert M, Chow J, Dacosta RS, Hoffman M, et al. DORA-compliant measures to assess research quality and impact in biomedical institutions: review of published research, international best practice and Delphi survey. 2022:1–32.
42. Bladek M. San francisco declaration on research assessment. *Rev Cuba Salud Publica*. 2014; 40(1):191–194.
43. DORA. San Francisco Declaration on Research Assessment [Internet]. 2022. Available from: <https://sfdora.org/>
44. Forrester N. How I learned to ask for help while maintaining my independence. *Science* [Internet]. 2018. Available from: <https://www.science.org/content/article/how-i-learned-ask-help-while-maintaining-my-independence>
45. EveryWoman. The science of asking for help—and 8 ways you can do it effectively. [Internet] 2021. Available from: <https://www.everywoman.com/my-development/science-asking-help-and-8-ways-you-can-do-it-effectively/>

46. Handelsman J, Cantor N, Carnes M, Denton D, Fine E, Grosz B, et al. More women in science. *Science*. 2005; 309(5738):1190–1191.
47. Kerkhoven AH, Russo P, Land-Zandstra AM, Saxena A, Rodenburg FJ. Gender stereotypes in science education resources: A visual content analysis. *PLoS ONE*. 2016; 11(11):1–13. <https://doi.org/10.1371/journal.pone.0165037> PMID: 27851759
48. Carli LL, Alawa L, Lee YA, Zhao B, Kim E. Stereotypes About Gender and Science: Women ≠ Scientists. *Psychol Women Q*. 2016; 40(2):244–260.
49. McKinnon M O'Connell C. Perceptions of stereotypes applied to women who publicly communicate their STEM work. *Humanit Soc Sci Commun [Internet]*. 2020; 7(1):1–8. <https://doi.org/10.1057/s41599-020-00654-0>
50. Robnett RD, Leaper C. Friendship Groups, Personal Motivation, and Gender in Relation to High School Students' STEM Career Interest. *J Res Adolesc*. 2013; 23(4):652–664.
51. Rupert DD, Nowlan AC, Tam OH, Hammell MG. Ten simple rules for running a successful women-in-STEM organization on an academic campus. *PLoS Comput Biol*. 2020 May; 16(5):e1007754.
52. UNESCO. International Day of Women and Girls in Science: Addressing and Transforming the Gender Gap [Internet]. 2021. Available from: <https://en.unesco.org/news/international-day-women-and-girls-science-addressing-and-transforming-gender-gap#:~:text=According to UNESCO's%2C Girls' and,at higher education level globally.>
53. Hill C, Corbett C. Why So Few? Women in Science, Technology, Engineering, and Mathematics. *IEEE Spectr*. 2002; 39:65–66.
54. Shoaib H, Cardella ME. A comparative study on gender bias in the purchase of STEM toys. In: ASEE Annual Conference and Exposition, Conference Proceedings. ASEE Conferences; 2020.
55. UNESCO. Cracking the code: Girls' and women's education in science, technology, engineering and mathematics (STEM) [Internet]. Vol. 26, Pigment and Resin Technology. Unesco; 2018 [cited 2022 Jul 1]. 86 p. Available from: <https://unesdoc.unesco.org/ark:/48223/pf0000253479>
56. Jean VA, Payne SC, Thompson RJ. Women in stem: Family-related challenges and initiatives. *Gender and the Work-Family Experience: An Intersection of Two Domains*. Springer International Publishing; 2015. p. 291–311.
57. Mason MA, Goulden M. Do babies matter? The effect of family formation on the lifelong careers of academic man and women. *Academe*. 2002; 88(6):21–27.
58. Dasgupta N, Stout JG. Girls and Women in Science, Technology, Engineering, and Mathematics: STEMing the Tide and Broadening Participation in STEM Careers. *Policy Insights Behav Brain Sci*. 2014; 1(1):21–29.
59. Chinchilla N, Las Heras M, Masuda AD. Balancing Work and Family: A Practical Guide to Help Organizations Meet the Global Workforce Challenge. 2010 [cited 2022 Jul 12]; Available from: <http://www.hrdpress.com>
60. Wepfert AG, Brauchli R, Jenny GJ, Hämmig O, Bauer GF. The experience of work-life balance across family-life stages in Switzerland: A cross-sectional questionnaire-based study. *BMC Public Health*. 2015; 15(1).
61. Greenhaus JH, Collins KM, Shaw JD. The relation between work-family balance and quality of life. *J Vocat Behav*. 2003; 63(3):510–531.
62. Frone MR. Work-family balance. *Handbook of occupational health psychology*. American Psychological Association; 2004. p. 143–62.
63. Clara AB. Balancing work, family and personal life: Perspectives of female staff at the College of Distance Education, University of Cape Coast, Ghana. *Int J Educ Adm Policy Stud*. 2020; 12(1):43–51.
64. Khondkar M. An Empirical Assessment of Women's Limited Access to Education and Higher Rate of Dropout. *Teach world. J Educ Res*. 2018;24–25(June).
65. Pew Research Center. How religion may affect educational attainment: scholarly theories and historical background. *Relig Educ around World [Internet]* 2016;Sec. 5,6. Available from: <https://www.pewforum.org/2016/12/13/how-religion-may-affect-educational-attainment-scholarly-theories-and-historical-background/>
66. Seifert K, Sutton R. Gender Differences in the Classroom. *Educ Psychol [Internet]*. 2015;72. Available from: <https://courses.lumenlearning.com/suny-educationalpsychology/chapter/gender-differences-in-the-classroom/>
67. Jones J. Why It's Never Too Late To Change Your Career [Internet]. 2019. Available from: <https://stemettes.org/zine/articles/is-it-ever-too-late-to-change-your-career/>
68. Bursztyn L, Fujiwara T, Pallais A. Imposter Syndrome Treat the Cause Not the Symptom. *Am Econ Rev*. 2017; 107(11):3288–3319.

69. Cuncic A. What Is Imposter Syndrome? [Internet]. Very Well Mind. 2020. p. 1–1. Available from: <https://www.verywellmind.com/imposter-syndrome-and-social-anxiety-disorder-4156469>
70. Girls in STEM. Imposter syndrome [Internet]. Vol. 6, Australian Government. 2021. Available from: <https://www.thegist.edu.au/students/explore-stem-careers/imposter-syndrome/#:~:text=In STEM—and other fields,sense of belonging fosters confidenc>
71. Gravois J. You're Not Fooling Anyone [Internet]. 2007. Available from: <https://www.chronicle.com/article/youre-not-fooling-anyone/>
72. Sakulku J, James A. The Impostor Phenomenon. *Int J Behav Sci*. 2001; 6(1):73–92.
73. Ibrahim M. Women feel like imposters in disciplines that value 'brilliance' [Internet]. *Science*. 2021. Available from: <https://www.science.org/content/article/women-feel-imposters-disciplines-value-brilliance>.
74. Bender D. 8 Tips to Reduce Imposter Syndrome [Internet]. 2021. Available from: <https://blog.nasm.org/tips-to-reduce-imposter-syndrome>
75. Cleveland Clinic. Impostor Syndrome: What It Is and How To Overcome It [Internet]. 2022. Available from: <https://health.clevelandclinic.org/a-psychologist-explains-how-to-deal-with-imposter-syndrome/>
